# Supplementary material for: Epigenetic landscape change analysis during human EMT sheds light on a key EMT mediator TRIM29
Source: PubMed Central journal article supplement (PMC5716732; doi:10.18632/oncotarget.21681), 2017-10-09
Supplement: oncotarget-08-98322-s001.pdf [file oncotarget-08-98322-s001.pdf]

## Epigenetic landscape change analysis during human EMT sheds light on a key EMT mediator TRIM29

### SUPPLEMENTARY MATERIALS

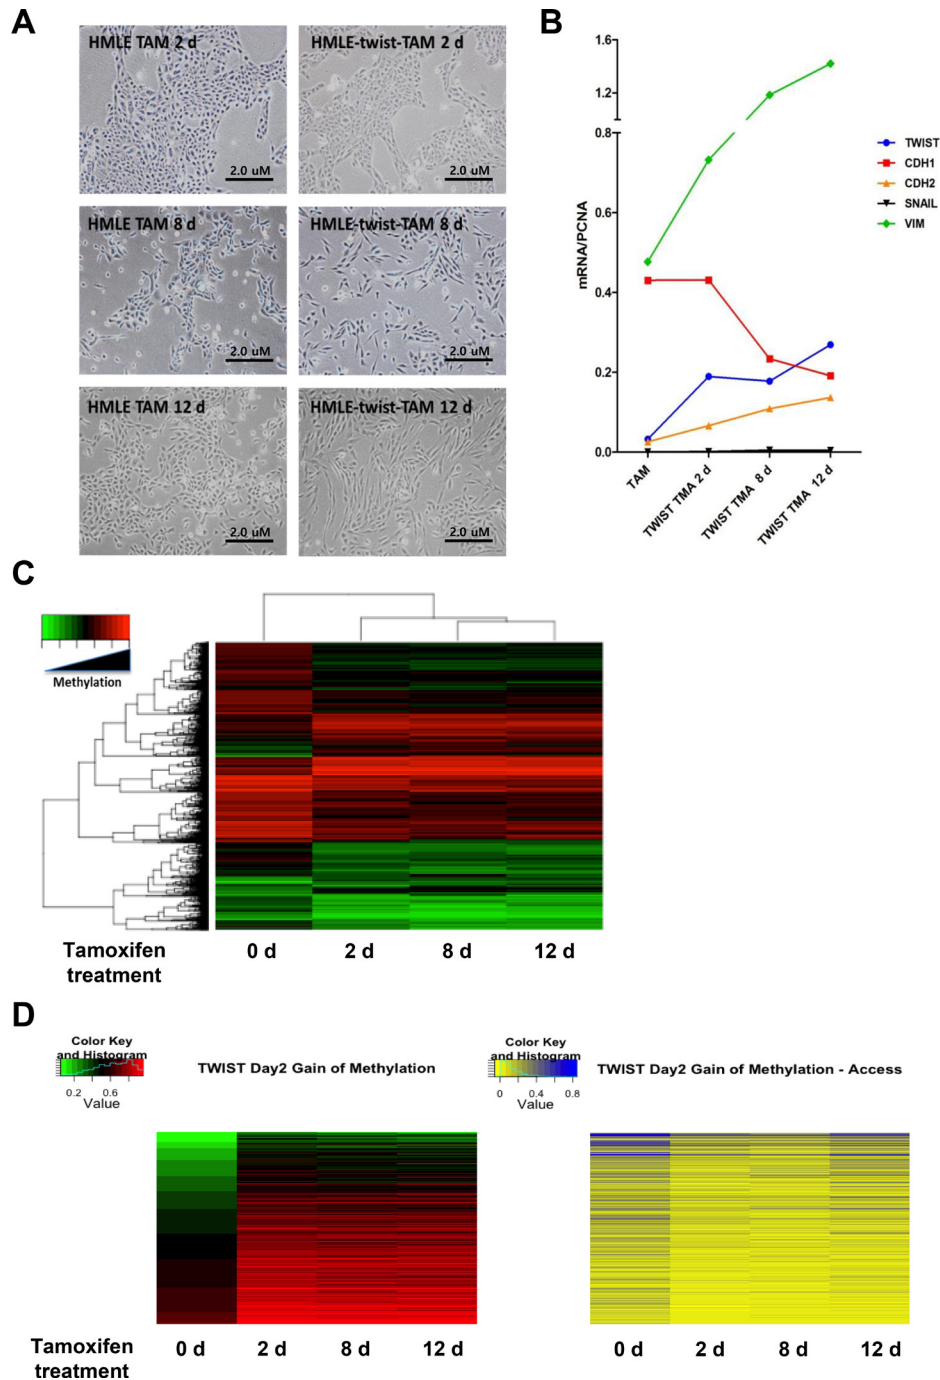

**Supplementary Figure 1:** (A) Phase-contrast images of HMEC expressing TWIST, and corresponding controls at days 2, 8 and 12 post-induction. EMT-like changes are apparent at day 8 in both systems. (B) Relative expression of the mRNAs encoding CDH1, CDH2, VIM, TWIST and SNAIL in HMEC induced to undergo EMT by TWIST induction, as determined by quantitative real-time PCR. GAPDH mRNA was used to normalize the variability in template loading. (C) Heatmap of the top 1 percent most variable probes on the platform, when compared across all samples for TWIST-driven EMT. Sustained gain and loss of methylation changes are observed during TWIST-EMT. (D) Heatmap and accessibility plot for all probes that gain methylation at day 2 post TWIST induction.

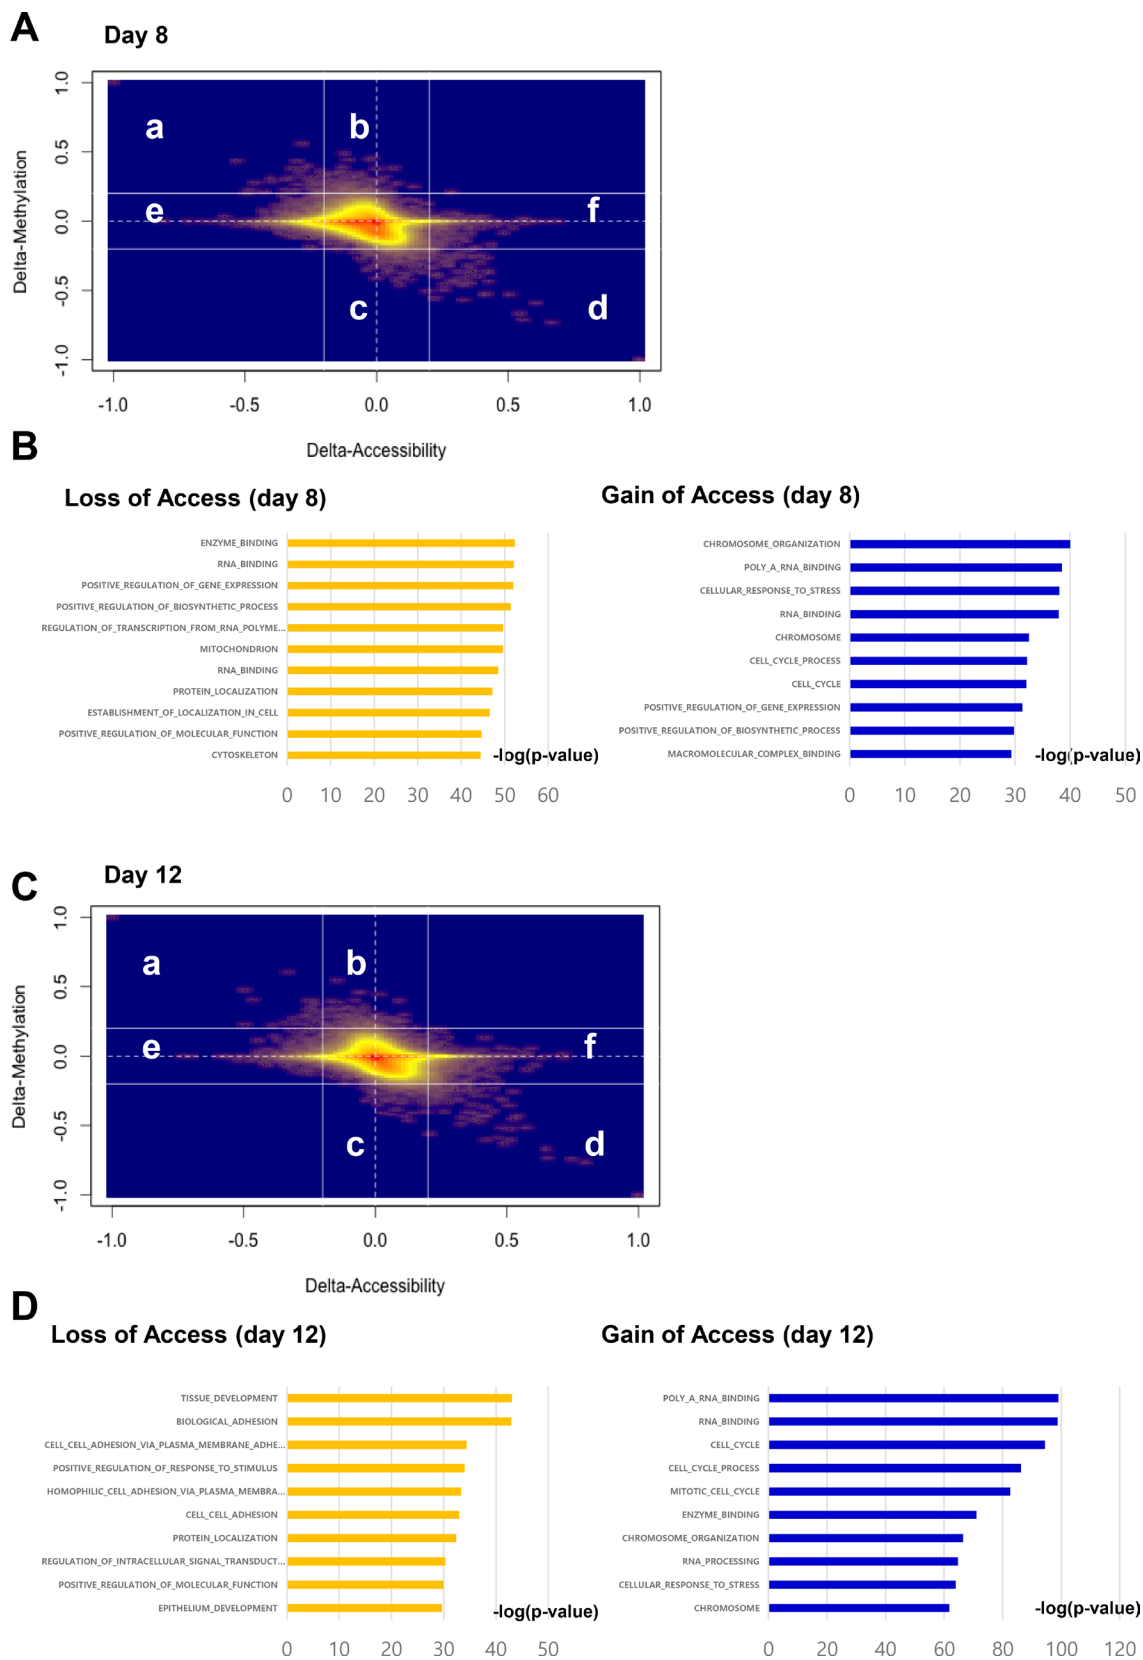

**Supplementary Figure 2:** (A) Smooth scatter plots of delta-methylation (methylation in treated – methylation in control) and delta-accessibility (accessibility in treated – accessibility in control) for day 8 for TWIST-overexpressing cells. (B) GSEA of gain and loss of accessibility genes for day 8. (C) Smooth scatter plots of delta-methylation (methylation in treated – methylation in control) and delta-accessibility (accessibility in treated – accessibility in control) for day 12 for TWIST-overexpressing cells. (D) GSEA of gain and loss of accessibility genes for day 12.

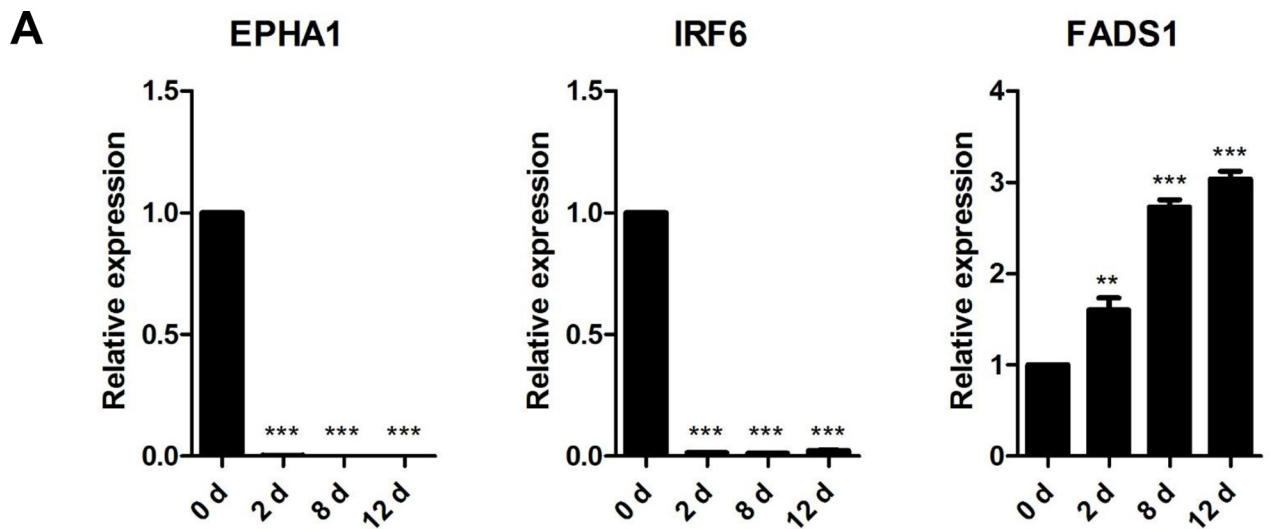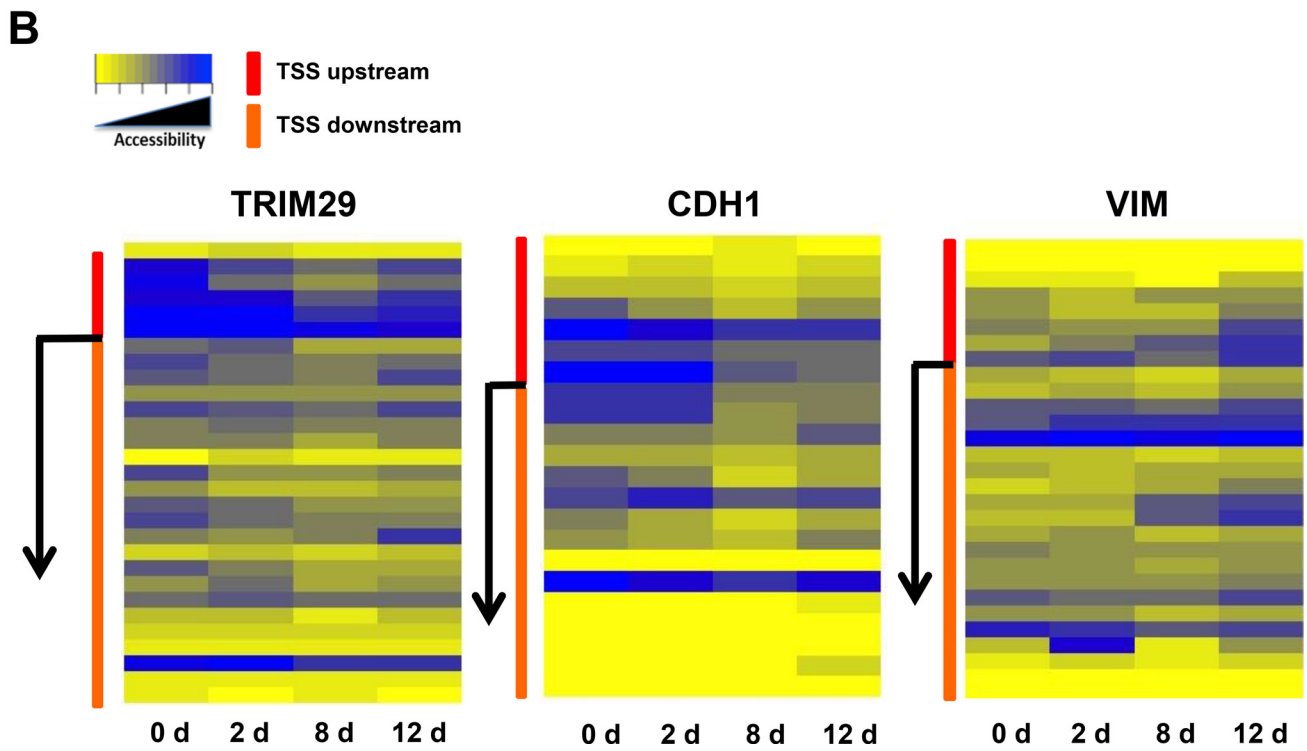

**Supplementary Figure 3:** (A) Real time RT-PCR analysis for EPHA1, IRF6 and FADS1 expression was performed during TWIST driven EMT. EPHA1 and IRF6 were significantly decreased from day 2 and FADS1 was increased. (B) Heatmaps displaying all the probes for TRIM29, CDH1 and VIM, arranged in the genomic context.

**A**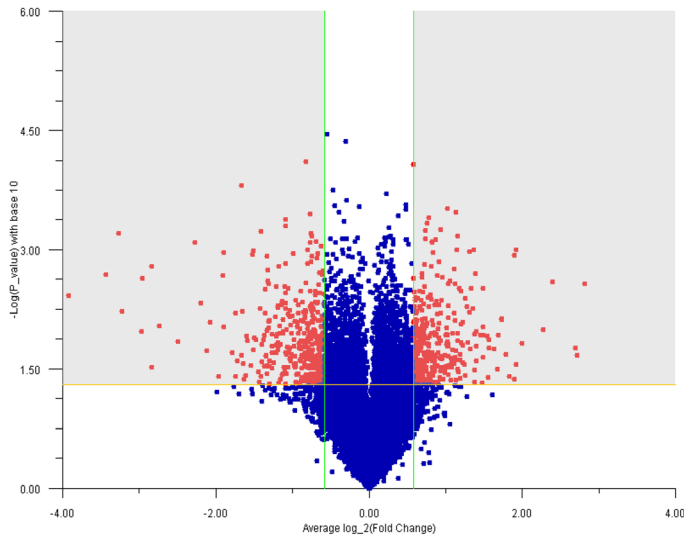**B**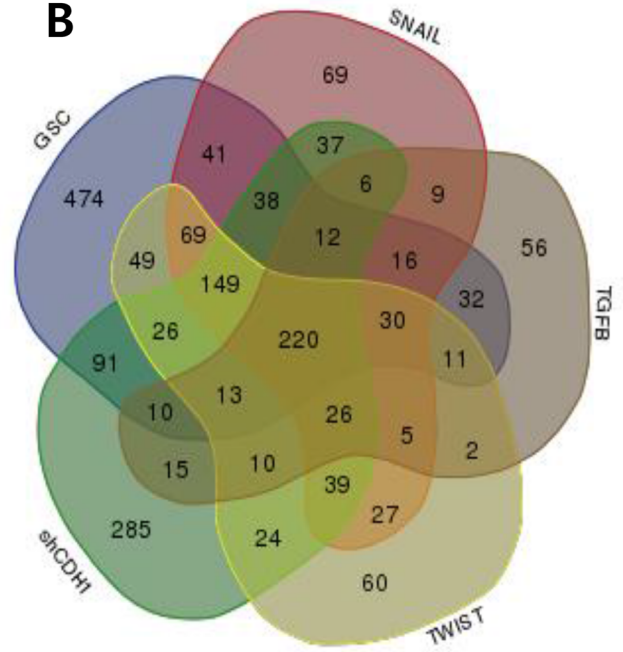**C**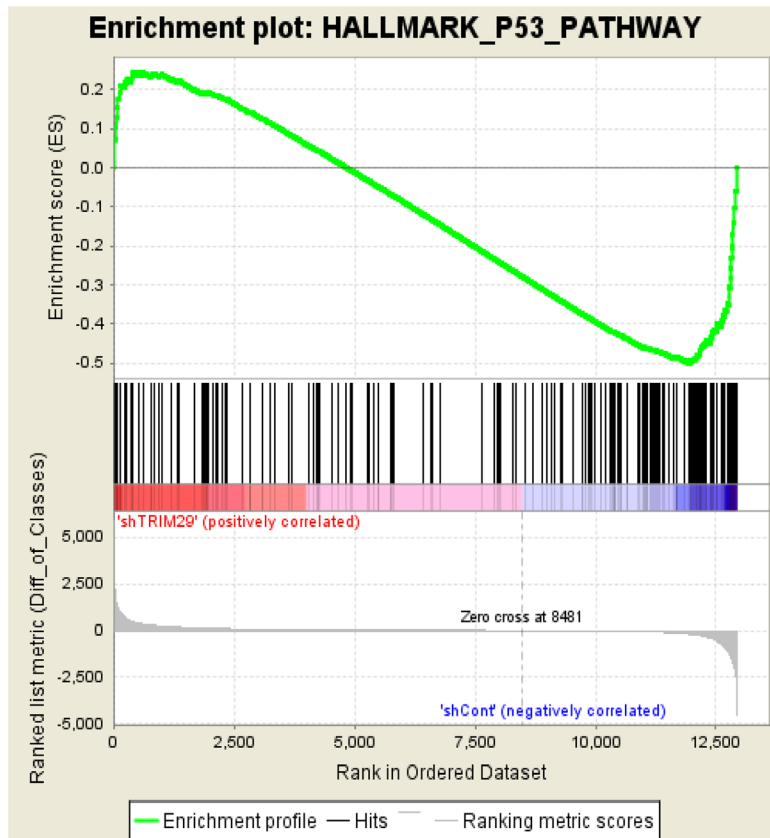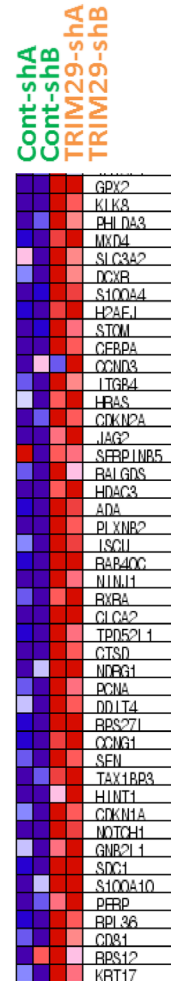

**Supplementary Figure 4:** (A) Volcano plots of gene expression differences for TRIM29 knockdown in HMEC (Significance Level 0.05, Fold Change Cutoff = 1.5, with Welch's *T*-Test). (B) Venn diagrams of the genes showing common genes in the core EMT signature. (C) GSEA of Hallmark\_P53 pathway with TRIM29 downstream targets.

**Supplementary Table 1: Genes of chromatin accessibility change during EMT. See Supplementary Table\_1**

**Supplementary Table 2: Genes showing up and down regulation in the core EMT signature with TRIM29 knockdown**

| Common Up- regulated | Common Down-regulated |
|----------------------|-----------------------|
| APOBEC3B             | CA9                   |
| BTG1                 | CELSR2                |
| CDH2                 | CLCA2                 |
| ECM2                 | FABP5                 |
| FADS1                | FAT2                  |
| GNG11                | FGFBP1                |
| HRASLS3              | FXYD3                 |
| IGFBP3               | HSD17B8               |
| LIMS1                | JAG2                  |
| LPIN1                | KLK10                 |
| PMP22                | KLK7                  |
| RAPGEF2              | KRT14                 |
| ROR1                 | KRT15                 |
|                      | KRT16                 |
|                      | KRT5                  |
|                      | MALL                  |
|                      | NMU                   |
|                      | PI3                   |
|                      | S100A7                |
|                      | S100A8                |
|                      | SDC1                  |
|                      | SERPINB13             |
|                      | SERPINB3              |
|                      | SFN                   |
|                      | SFRP1                 |
|                      | SLPI                  |
|                      | SNCA                  |
|                      | SPRR1A                |
|                      | SPRR1B                |
|                      | ST6GAL1               |
|                      | TNFSF10               |
|                      | TP73L                 |
|                      | TRIM29                |
|                      | VSNL1                 |
